# Supplementary material
Source: MDPI journal article supplement (https://www.mdpi.com/2073-4352/2/2/338)
Supplement: s1 [file s1]

 
data_4
_publ_requested_journal         'test' 
_audit_creation_method            SHELXL-97
_chemical_name_systematic
;
 ?
;
_chemical_name_common             ?
_chemical_melting_point           ?
_chemical_formula_moiety          'C35 H27 Cl2 N3 S12 Zn'
_chemical_formula_sum
 'C35 H27 Cl2 N3 S12 Zn'
_chemical_formula_weight          1010.59
 
loop_
 _atom_type_symbol
 _atom_type_description
 _atom_type_scat_dispersion_real
 _atom_type_scat_dispersion_imag
 _atom_type_scat_source
 'C'  'C'   0.0033   0.0016
 'International Tables Vol C Tables 4.2.6.8 and 6.1.1.4'
 'H'  'H'   0.0000   0.0000
 'International Tables Vol C Tables 4.2.6.8 and 6.1.1.4'
 'N'  'N'   0.0061   0.0033
 'International Tables Vol C Tables 4.2.6.8 and 6.1.1.4'
 'S'  'S'   0.1246   0.1234
 'International Tables Vol C Tables 4.2.6.8 and 6.1.1.4'
 'Cl'  'Cl'   0.1484   0.1585
 'International Tables Vol C Tables 4.2.6.8 and 6.1.1.4'
 'Zn'  'Zn'   0.2839   1.4301
 'International Tables Vol C Tables 4.2.6.8 and 6.1.1.4'
 
_symmetry_cell_setting            Monoclinic
_symmetry_space_group_name_H-M    C2/c
 
loop_
 _symmetry_equiv_pos_as_xyz
 'x, y, z'
 '-x, y, -z+1/2'
 'x+1/2, y+1/2, z'
 '-x+1/2, y+1/2, -z+1/2'
 '-x, -y, -z'
 'x, -y, z-1/2'
 '-x+1/2, -y+1/2, -z'
 'x+1/2, -y+1/2, z-1/2'
 
_cell_length_a                    11.8152(16)
_cell_length_b                    10.100(2)
_cell_length_c                    35.579(6)
_cell_angle_alpha                 90.00
_cell_angle_beta                  98.111(13)
_cell_angle_gamma                 90.00
_cell_volume                      4203.2(12)
_cell_formula_units_Z             4
_cell_measurement_temperature     293(2)
_cell_measurement_reflns_used     9352
_cell_measurement_theta_min       1.16
_cell_measurement_theta_max       27.54
 
_exptl_crystal_description        plate
_exptl_crystal_colour             dark
_exptl_crystal_size_max           0.3
_exptl_crystal_size_mid           0.2
_exptl_crystal_size_min           0.01
_exptl_crystal_density_meas       'not measured'
_exptl_crystal_density_diffrn     1.597
_exptl_crystal_density_method     'not measured'
_exptl_crystal_F_000              2056
_exptl_absorpt_coefficient_mu     1.340
_exptl_absorpt_correction_type    multi-scan
_exptl_absorpt_correction_T_min   0.732
_exptl_absorpt_correction_T_max   0.987
_exptl_absorpt_process_details    'sadabs'
 
_exptl_special_details
;
 ?
;
 
_diffrn_ambient_temperature       293(2)
_diffrn_radiation_wavelength      0.71073
_diffrn_radiation_type            MoK\a
_diffrn_radiation_source          'fine-focus sealed tube'
_diffrn_radiation_monochromator   graphite
_diffrn_measurement_device_type   area_detector
_diffrn_measurement_method        'CCD'
_diffrn_detector_area_resol_mean  ?
_diffrn_standards_number          ?
_diffrn_standards_interval_count  ?
_diffrn_standards_interval_time   ?
_diffrn_standards_decay_%         ?
_diffrn_reflns_number             55720
_diffrn_reflns_av_R_equivalents   0.0560
_diffrn_reflns_av_sigmaI/netI     0.0294
_diffrn_reflns_limit_h_min        -15
_diffrn_reflns_limit_h_max        15
_diffrn_reflns_limit_k_min        -13
_diffrn_reflns_limit_k_max        13
_diffrn_reflns_limit_l_min        -45
_diffrn_reflns_limit_l_max        46
_diffrn_reflns_theta_min          1.16
_diffrn_reflns_theta_max          27.54
_reflns_number_total              4760
_reflns_number_gt                 3371
_reflns_threshold_expression      >2sigma(I)
 
_computing_data_collection        'KappaCCD'
_computing_cell_refinement        'Dirax/lsq (Duisenberg & Schreurs, 1989-2000)'
_computing_data_reduction         'Denzo and Scalepak'
_computing_structure_solution     'SHELXS-97 (Sheldrick, 1997)'
_computing_structure_refinement   'SHELXL-97 (Sheldrick, 1997)'
_computing_molecular_graphics     ?
_computing_publication_material   ?
 
_refine_special_details
;
 Refinement of F^2^ against ALL reflections.  The weighted R-factor wR and
 goodness of fit S are based on F^2^, conventional R-factors R are based
 on F, with F set to zero for negative F^2^. The threshold expression of
 F^2^ > 2sigma(F^2^) is used only for calculating R-factors(gt) etc. and is
 not relevant to the choice of reflections for refinement.  R-factors based
 on F^2^ are statistically about twice as large as those based on F, and R-
 factors based on ALL data will be even larger.
;
 
_refine_ls_structure_factor_coef  Fsqd
_refine_ls_matrix_type            full
_refine_ls_weighting_scheme       calc
_refine_ls_weighting_details
 'calc w=1/[\s^2^(Fo^2^)+(0.0219P)^2^+17.1909P] where P=(Fo^2^+2Fc^2^)/3'
_atom_sites_solution_primary      direct
_atom_sites_solution_secondary    difmap
_atom_sites_solution_hydrogens    geom
_refine_ls_hydrogen_treatment     constr
_refine_ls_extinction_method      none
_refine_ls_extinction_coef        ?
_refine_ls_number_reflns          4760
_refine_ls_number_parameters      243
_refine_ls_number_restraints      0
_refine_ls_R_factor_all           0.0968
_refine_ls_R_factor_gt            0.0597
_refine_ls_wR_factor_ref          0.1227
_refine_ls_wR_factor_gt           0.1051
_refine_ls_goodness_of_fit_ref    1.197
_refine_ls_restrained_S_all       1.197
_refine_ls_shift/su_max           0.000
_refine_ls_shift/su_mean          0.000
 
loop_
 _atom_site_label
 _atom_site_type_symbol
 _atom_site_fract_x
 _atom_site_fract_y
 _atom_site_fract_z
 _atom_site_U_iso_or_equiv
 _atom_site_adp_type
 _atom_site_occupancy
 _atom_site_symmetry_multiplicity
 _atom_site_calc_flag
 _atom_site_refinement_flags
 _atom_site_disorder_assembly
 _atom_site_disorder_group
C1 C 1.0729(3) 0.4344(4) 0.23134(13) 0.0473(10) Uani 1 1 d . . .
C2 C 1.0754(4) 0.5716(5) 0.23095(15) 0.0589(12) Uani 1 1 d . . .
H2 H 1.1269 0.6167 0.2181 0.071 Uiso 1 1 calc R . .
C3 C 1.0000 0.6398(7) 0.2500 0.0630(19) Uani 1 2 d S . .
H3 H 1.0000 0.7319 0.2500 0.076 Uiso 1 2 calc SR . .
C4 C 1.1474(3) 0.3526(4) 0.21153(13) 0.0505(11) Uani 1 1 d . . .
H4 H 1.2012 0.3923 0.1984 0.061 Uiso 1 1 calc R . .
C5 C 1.2087(3) 0.1459(4) 0.19236(12) 0.0439(10) Uani 1 1 d . . .
C6 C 1.2863(4) 0.1955(5) 0.16954(14) 0.0561(12) Uani 1 1 d . . .
H6 H 1.2939 0.2865 0.1667 0.067 Uiso 1 1 calc R . .
C7 C 1.3509(4) 0.1108(5) 0.15144(14) 0.0579(12) Uani 1 1 d . . .
H7 H 1.4017 0.1455 0.1363 0.069 Uiso 1 1 calc R . .
C8 C 1.3429(3) -0.0255(4) 0.15507(12) 0.0437(10) Uani 1 1 d . . .
C9 C 1.2657(4) -0.0748(5) 0.17822(13) 0.0526(11) Uani 1 1 d . . .
H9 H 1.2596 -0.1657 0.1816 0.063 Uiso 1 1 calc R . .
C10 C 1.1991(4) 0.0101(4) 0.19595(13) 0.0511(11) Uani 1 1 d . . .
H10 H 1.1468 -0.0244 0.2106 0.061 Uiso 1 1 calc R . .
C11 C 1.4096(3) -0.1167(4) 0.13439(12) 0.0460(10) Uani 1 1 d . . .
C12 C 1.3832(4) -0.2412(5) 0.12453(14) 0.0581(13) Uani 1 1 d . . .
H12 H 1.3191 -0.2807 0.1322 0.070 Uiso 1 1 calc R . .
C13 C 1.5676(4) -0.2017(4) 0.09587(13) 0.0509(11) Uani 1 1 d . . .
C14 C 1.6602(4) -0.2170(4) 0.07846(13) 0.0504(11) Uani 1 1 d . . .
C15 C 1.8591(4) -0.2013(5) 0.05543(13) 0.0511(11) Uani 1 1 d . . .
C16 C 1.8185(3) -0.3213(4) 0.04402(13) 0.0502(11) Uani 1 1 d . . .
C17 C 2.0732(5) -0.1735(7) 0.0925(2) 0.108(3) Uani 1 1 d . . .
H17A H 2.0360 -0.1339 0.1120 0.162 Uiso 1 1 calc R . .
H17B H 2.1484 -0.1367 0.0933 0.162 Uiso 1 1 calc R . .
H17C H 2.0788 -0.2674 0.0965 0.162 Uiso 1 1 calc R . .
C18 C 1.8149(5) -0.5806(5) 0.01695(18) 0.0838(18) Uani 1 1 d . . .
H18A H 1.8133 -0.6126 0.0423 0.126 Uiso 1 1 calc R . .
H18B H 1.8504 -0.6455 0.0027 0.126 Uiso 1 1 calc R . .
H18C H 1.7381 -0.5649 0.0049 0.126 Uiso 1 1 calc R . .
N1 N 1.0000 0.3674(5) 0.2500 0.0436(11) Uani 1 2 d S . .
N2 N 1.1388(3) 0.2272(4) 0.21217(10) 0.0446(8) Uani 1 1 d . . .
S1 S 1.53628(10) -0.05544(12) 0.11918(4) 0.0591(3) Uani 1 1 d . . .
S2 S 1.46743(11) -0.32923(13) 0.09772(5) 0.0701(4) Uani 1 1 d . . .
S3 S 1.76945(10) -0.09874(12) 0.07874(4) 0.0599(3) Uani 1 1 d . . .
S4 S 1.68137(10) -0.36255(12) 0.05310(4) 0.0607(4) Uani 1 1 d . . .
S5 S 1.89477(11) -0.42916(14) 0.01874(4) 0.0695(4) Uani 1 1 d . . .
S6 S 1.99126(11) -0.14075(14) 0.04689(4) 0.0680(4) Uani 1 1 d . . .
Cl1 Cl 0.88531(11) 0.05265(14) 0.20566(4) 0.0718(4) Uani 1 1 d . . .
Zn1 Zn 1.0000 0.16427(7) 0.2500 0.0482(2) Uani 1 2 d S . .
 
loop_
 _atom_site_aniso_label
 _atom_site_aniso_U_11
 _atom_site_aniso_U_22
 _atom_site_aniso_U_33
 _atom_site_aniso_U_23
 _atom_site_aniso_U_13
 _atom_site_aniso_U_12
C1 0.036(2) 0.043(2) 0.064(3) -0.003(2) 0.0064(19) -0.0071(18)
C2 0.050(3) 0.045(3) 0.084(4) 0.000(2) 0.017(2) -0.009(2)
C3 0.067(4) 0.033(4) 0.090(5) 0.000 0.015(4) 0.000
C4 0.041(2) 0.049(3) 0.065(3) 0.000(2) 0.021(2) -0.013(2)
C5 0.037(2) 0.045(2) 0.052(2) -0.001(2) 0.0119(18) -0.0038(18)
C6 0.058(3) 0.043(3) 0.073(3) 0.005(2) 0.032(2) -0.004(2)
C7 0.053(3) 0.054(3) 0.073(3) 0.003(2) 0.033(2) -0.004(2)
C8 0.038(2) 0.046(3) 0.049(2) -0.004(2) 0.0136(18) -0.0029(18)
C9 0.058(3) 0.043(3) 0.060(3) 0.002(2) 0.021(2) -0.007(2)
C10 0.048(2) 0.050(3) 0.061(3) -0.002(2) 0.026(2) -0.007(2)
C11 0.039(2) 0.046(3) 0.055(3) 0.001(2) 0.0148(19) -0.0056(18)
C12 0.043(2) 0.057(3) 0.080(3) -0.007(3) 0.030(2) -0.008(2)
C13 0.046(2) 0.047(3) 0.063(3) -0.009(2) 0.022(2) -0.0092(19)
C14 0.049(2) 0.048(3) 0.059(3) -0.007(2) 0.022(2) -0.011(2)
C15 0.047(2) 0.051(3) 0.060(3) -0.010(2) 0.023(2) -0.014(2)
C16 0.043(2) 0.051(3) 0.061(3) -0.008(2) 0.022(2) -0.009(2)
C17 0.058(3) 0.096(5) 0.163(7) 0.043(5) -0.010(4) -0.023(3)
C18 0.096(4) 0.054(3) 0.110(5) -0.018(3) 0.046(4) -0.015(3)
N1 0.029(2) 0.040(3) 0.063(3) 0.000 0.009(2) 0.000
N2 0.0353(17) 0.042(2) 0.058(2) -0.0004(17) 0.0141(15) -0.0050(15)
S1 0.0545(7) 0.0493(7) 0.0808(9) -0.0133(6) 0.0348(6) -0.0123(5)
S2 0.0601(7) 0.0487(7) 0.1114(11) -0.0210(7) 0.0467(8) -0.0152(6)
S3 0.0566(7) 0.0507(7) 0.0789(9) -0.0195(6) 0.0322(6) -0.0179(5)
S4 0.0520(6) 0.0519(7) 0.0853(9) -0.0211(6) 0.0341(6) -0.0206(5)
S5 0.0626(8) 0.0611(8) 0.0929(10) -0.0273(7) 0.0391(7) -0.0113(6)
S6 0.0508(7) 0.0651(9) 0.0940(10) -0.0159(7) 0.0307(7) -0.0227(6)
Cl1 0.0630(7) 0.0757(9) 0.0805(9) -0.0192(7) 0.0230(7) -0.0337(7)
Zn1 0.0422(4) 0.0376(4) 0.0662(5) 0.000 0.0124(3) 0.000
 
_geom_special_details
;
 All esds (except the esd in the dihedral angle between two l.s. planes)
 are estimated using the full covariance matrix.  The cell esds are taken
 into account individually in the estimation of esds in distances, angles
 and torsion angles; correlations between esds in cell parameters are only
 used when they are defined by crystal symmetry.  An approximate (isotropic)
 treatment of cell esds is used for estimating esds involving l.s. planes.
;
 
loop_
 _geom_bond_atom_site_label_1
 _geom_bond_atom_site_label_2
 _geom_bond_distance
 _geom_bond_site_symmetry_2
 _geom_bond_publ_flag
C1 N1 1.342(5) . ?
C1 C2 1.387(6) . ?
C1 C4 1.459(6) . ?
C2 C3 1.377(6) . ?
C2 H2 0.9300 . ?
C3 C2 1.377(6) 2_755 ?
C3 H3 0.9300 . ?
C4 N2 1.271(5) . ?
C4 H4 0.9300 . ?
C5 C10 1.384(6) . ?
C5 C6 1.400(5) . ?
C5 N2 1.420(5) . ?
C6 C7 1.367(6) . ?
C6 H6 0.9300 . ?
C7 C8 1.387(6) . ?
C7 H7 0.9300 . ?
C8 C9 1.403(5) . ?
C8 C11 1.475(6) . ?
C9 C10 1.376(6) . ?
C9 H9 0.9300 . ?
C10 H10 0.9300 . ?
C11 C12 1.330(6) . ?
C11 S1 1.774(4) . ?
C12 S2 1.720(4) . ?
C12 H12 0.9300 . ?
C13 C14 1.340(5) . ?
C13 S2 1.756(4) . ?
C13 S1 1.759(4) . ?
C14 S3 1.758(4) . ?
C14 S4 1.761(5) . ?
C15 C16 1.345(6) . ?
C15 S6 1.743(4) . ?
C15 S3 1.769(4) . ?
C16 S5 1.742(4) . ?
C16 S4 1.747(4) . ?
C17 S6 1.798(7) . ?
C17 H17A 0.9600 . ?
C17 H17B 0.9600 . ?
C17 H17C 0.9600 . ?
C18 S5 1.794(5) . ?
C18 H18A 0.9600 . ?
C18 H18B 0.9600 . ?
C18 H18C 0.9600 . ?
N1 C1 1.342(5) 2_755 ?
N1 Zn1 2.052(5) . ?
N2 Zn1 2.351(3) . ?
Cl1 Zn1 2.2345(13) . ?
Zn1 Cl1 2.2345(13) 2_755 ?
Zn1 N2 2.351(3) 2_755 ?
 
loop_
 _geom_angle_atom_site_label_1
 _geom_angle_atom_site_label_2
 _geom_angle_atom_site_label_3
 _geom_angle
 _geom_angle_site_symmetry_1
 _geom_angle_site_symmetry_3
 _geom_angle_publ_flag
N1 C1 C2 121.6(4) . . ?
N1 C1 C4 115.3(4) . . ?
C2 C1 C4 123.1(4) . . ?
C3 C2 C1 118.6(5) . . ?
C3 C2 H2 120.7 . . ?
C1 C2 H2 120.7 . . ?
C2 C3 C2 120.0(6) 2_755 . ?
C2 C3 H3 120.0 2_755 . ?
C2 C3 H3 120.0 . . ?
N2 C4 C1 120.0(4) . . ?
N2 C4 H4 120.0 . . ?
C1 C4 H4 120.0 . . ?
C10 C5 C6 118.5(4) . . ?
C10 C5 N2 117.8(4) . . ?
C6 C5 N2 123.7(4) . . ?
C7 C6 C5 120.3(4) . . ?
C7 C6 H6 119.9 . . ?
C5 C6 H6 119.9 . . ?
C6 C7 C8 121.8(4) . . ?
C6 C7 H7 119.1 . . ?
C8 C7 H7 119.1 . . ?
C7 C8 C9 117.7(4) . . ?
C7 C8 C11 121.7(4) . . ?
C9 C8 C11 120.5(4) . . ?
C10 C9 C8 120.6(4) . . ?
C10 C9 H9 119.7 . . ?
C8 C9 H9 119.7 . . ?
C9 C10 C5 121.1(4) . . ?
C9 C10 H10 119.5 . . ?
C5 C10 H10 119.5 . . ?
C12 C11 C8 126.9(4) . . ?
C12 C11 S1 115.2(3) . . ?
C8 C11 S1 117.9(3) . . ?
C11 C12 S2 120.2(3) . . ?
C11 C12 H12 119.9 . . ?
S2 C12 H12 119.9 . . ?
C14 C13 S2 122.1(3) . . ?
C14 C13 S1 123.7(3) . . ?
S2 C13 S1 114.2(2) . . ?
C13 C14 S3 124.5(4) . . ?
C13 C14 S4 121.2(3) . . ?
S3 C14 S4 114.4(2) . . ?
C16 C15 S6 123.6(3) . . ?
C16 C15 S3 117.2(3) . . ?
S6 C15 S3 119.1(3) . . ?
C15 C16 S5 122.1(3) . . ?
C15 C16 S4 117.4(3) . . ?
S5 C16 S4 120.5(3) . . ?
S6 C17 H17A 109.5 . . ?
S6 C17 H17B 109.5 . . ?
H17A C17 H17B 109.5 . . ?
S6 C17 H17C 109.5 . . ?
H17A C17 H17C 109.5 . . ?
H17B C17 H17C 109.5 . . ?
S5 C18 H18A 109.5 . . ?
S5 C18 H18B 109.5 . . ?
H18A C18 H18B 109.5 . . ?
S5 C18 H18C 109.5 . . ?
H18A C18 H18C 109.5 . . ?
H18B C18 H18C 109.5 . . ?
C1 N1 C1 119.5(5) 2_755 . ?
C1 N1 Zn1 120.2(3) 2_755 . ?
C1 N1 Zn1 120.2(3) . . ?
C4 N2 C5 120.9(4) . . ?
C4 N2 Zn1 110.1(3) . . ?
C5 N2 Zn1 129.0(3) . . ?
C13 S1 C11 95.4(2) . . ?
C12 S2 C13 95.0(2) . . ?
C14 S3 C15 95.0(2) . . ?
C16 S4 C14 95.7(2) . . ?
C16 S5 C18 104.1(2) . . ?
C15 S6 C17 99.2(3) . . ?
N1 Zn1 Cl1 120.30(4) . . ?
N1 Zn1 Cl1 120.30(4) . 2_755 ?
Cl1 Zn1 Cl1 119.40(9) . 2_755 ?
N1 Zn1 N2 74.31(9) . 2_755 ?
Cl1 Zn1 N2 97.94(9) . 2_755 ?
Cl1 Zn1 N2 97.74(9) 2_755 2_755 ?
N1 Zn1 N2 74.31(9) . . ?
Cl1 Zn1 N2 97.74(9) . . ?
Cl1 Zn1 N2 97.94(9) 2_755 . ?
N2 Zn1 N2 148.63(18) 2_755 . ?
 
_diffrn_measured_fraction_theta_max    0.985
_diffrn_reflns_theta_full              27.54
_diffrn_measured_fraction_theta_full   0.985
_refine_diff_density_max    0.394
_refine_diff_density_min   -0.416
_refine_diff_density_rms    0.077
